# Supplementary material
Source: ML conference proceedings conference paper supplement (https://openreview.net/forum?id=zbKcFZ6Dbp)
Supplement: supplementary_material [file attachment]

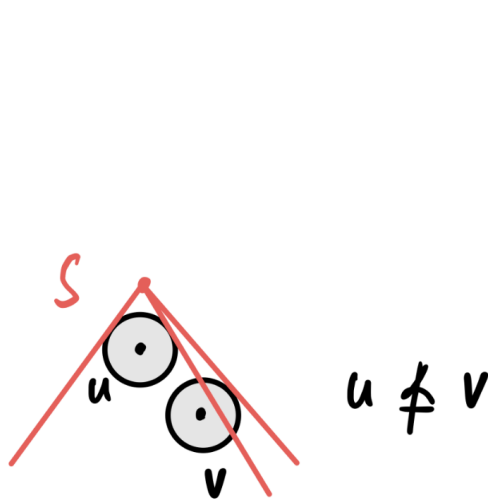

Figure 1: An example illustrating the necessity for  $v$ 's ball to be entirely immersed in  $u$ 's umbral shadow, in order that  $u \preceq v$ . In the marginal case shown here,  $u \not\preceq v$  even though the point  $v$  is in  $u$ 's umbral shadow. This is because part of  $v$ 's ball and corresponding umbral shadow is outside of  $u$ 's umbral shadow.

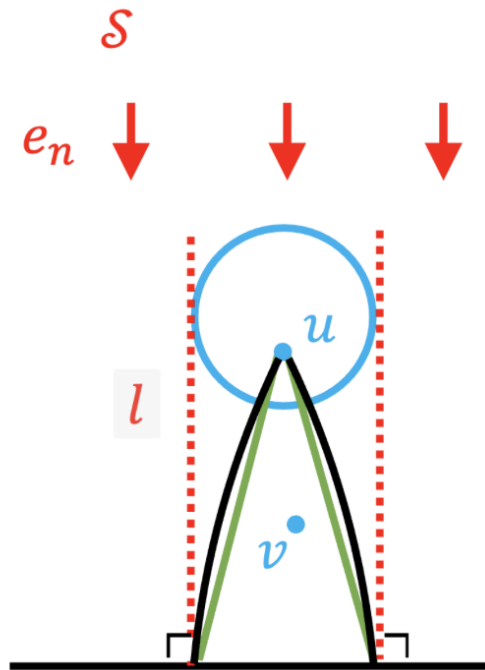

Figure 2: Umbral shadow cone (green) of  $u$  in half-space model with light source  $\mathcal{S}$  at infinity, where  $e_n$  is the propagation direction of lights.  $l$  (dotted red) denotes the boundary of umbral shadow casted by  $u$  and its ball. Solid green lines denote the boundary of the umbral cone of  $u$ , while solid black lines delineate the geodesically convex hull of  $u$ 's umbral cone. This figure shows that umbral cones are not geodesically convex, because they are strict subsets of their geodesically convex hulls.

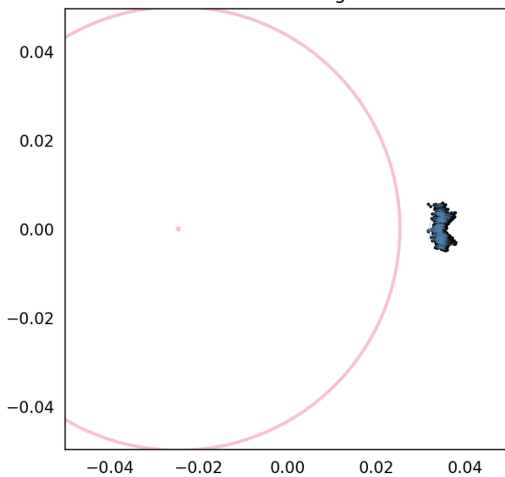

Figure 3: A global view of learned Mammal subgraph embeddings with a trainable light source radius, using Penumbral-Poincaré-ball.

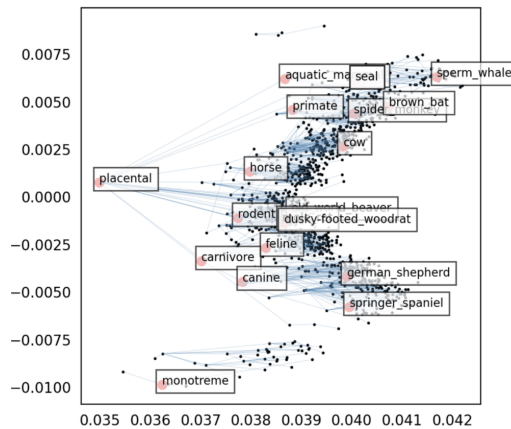

Figure 4: A zoomed-in view of learned Mammal subgraph embeddings with a trainable light source radius, using Penumbral-Poincaré-ball.
